# Supplementary material for: Exposure to Maternal Depressive Symptoms in Fetal Life or Childhood and Offspring Brain Development: A Population-Based Imaging Study
Source: Atypon-hosted journal article supplement (doi:10.1176/appi.ajp.2019.18080970), 2019-05-06
Supplement: appi.ajp.2019.18080970.ds001.pdf [file appi.ajp.2019.18080970.ds001.pdf]

**FIGURE S1. Flow chart of the study population**

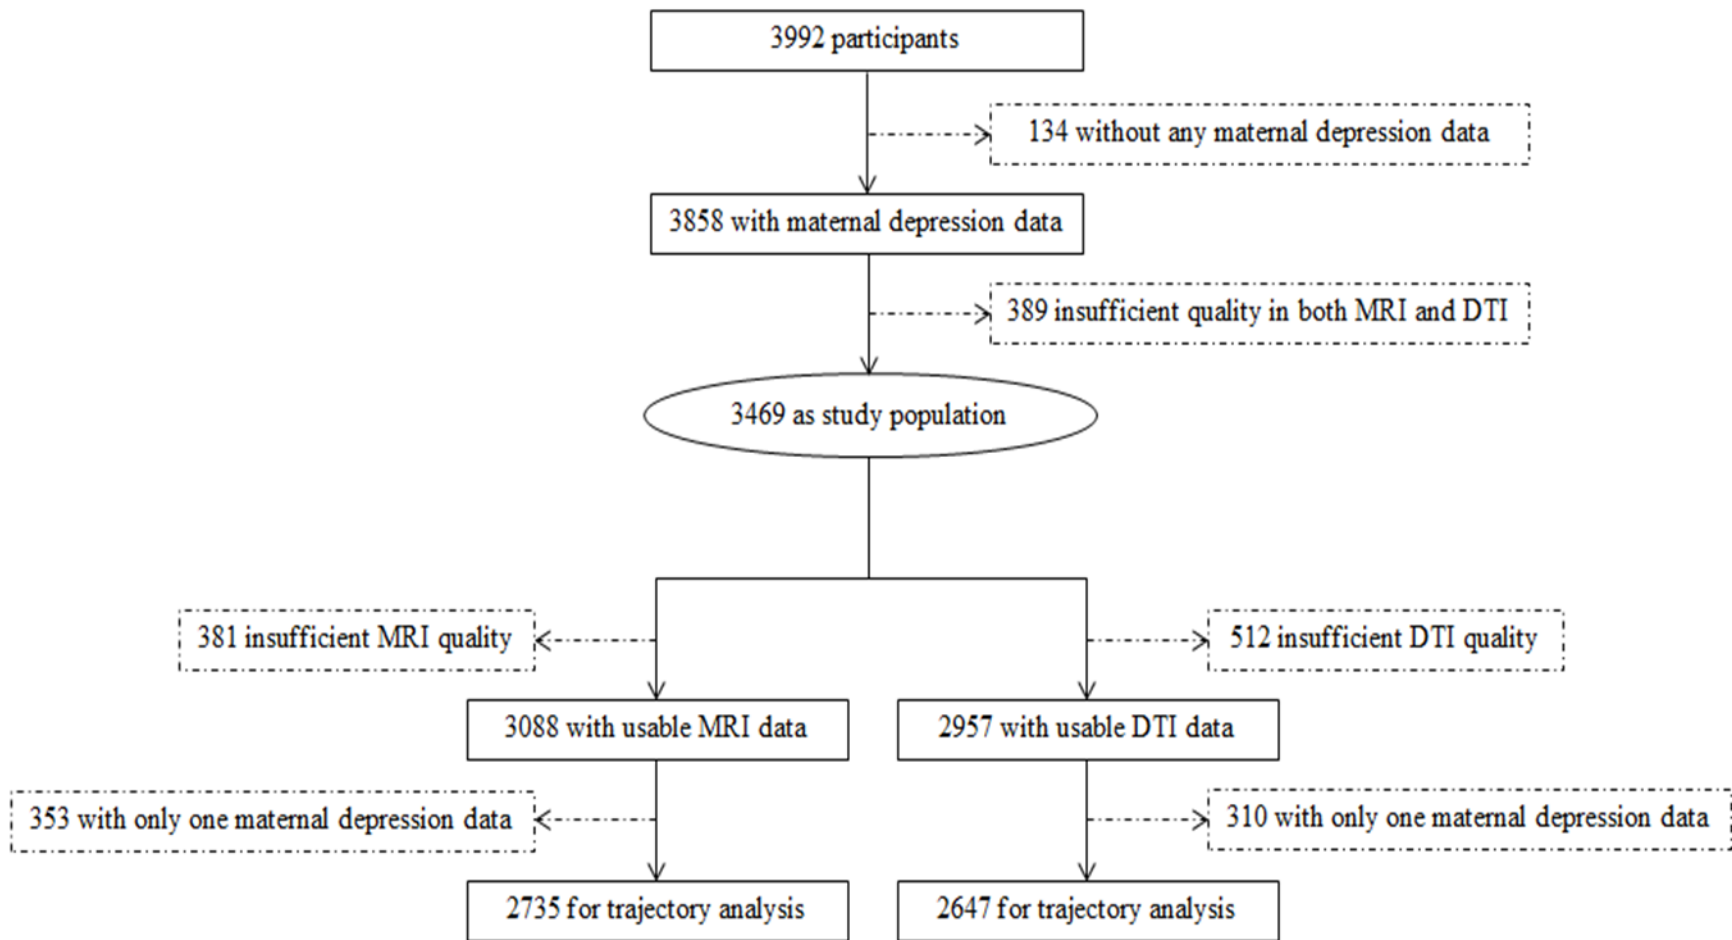

**TABLE S1. Maternal depressive symptoms and volume of specific limbic structures in children**

| Maternal Depressive Symptoms   | Thalamus (cm <sup>3</sup> ) |             |      | Amygdala (cm <sup>3</sup> ) |              |      | Hippocampus (cm <sup>3</sup> ) |              |      |
|--------------------------------|-----------------------------|-------------|------|-----------------------------|--------------|------|--------------------------------|--------------|------|
|                                | B                           | 95% CI      | p    | B                           | 95% CI       | p    | B                              | 95% CI       | p    |
| 20 weeks of gestation (N=2348) |                             |             |      |                             |              |      |                                |              |      |
| Model 1 <sup>a</sup>           | 0.02                        | -0.06, 0.11 | 0.58 | 0.03                        | -0.003, 0.06 | 0.08 | 0.05                           | -0.001, 0.11 | 0.05 |
| Model 2 <sup>b</sup>           | 0.04                        | -0.06, 0.13 | 0.44 | 0.02                        | -0.01, 0.05  | 0.20 | 0.06                           | -0.01, 0.12  | 0.07 |
| Child age 2 months (N=2083)    |                             |             |      |                             |              |      |                                |              |      |
| Model 1                        | 0.02                        | -0.07, 0.10 | 0.74 | -0.01                       | -0.04, 0.02  | 0.51 | -0.03                          | -0.08, 0.03  | 0.38 |
| Model 2                        | 0.02                        | -0.07, 0.11 | 0.71 | -0.02                       | -0.05, 0.01  | 0.21 | -0.03                          | -0.09, 0.03  | 0.32 |
| Child age 3 years (N=2207)     |                             |             |      |                             |              |      |                                |              |      |
| Model 1                        | -0.02                       | -0.14, 0.10 | 0.74 | 0.02                        | -0.03, 0.06  | 0.46 | -0.04                          | -0.12, 0.03  | 0.27 |
| Model 2                        | -0.01                       | -0.13, 0.11 | 0.88 | 0.01                        | -0.03, 0.05  | 0.61 | -0.05                          | -0.13, 0.03  | 0.24 |
| Child age 10 years (N=2676)    |                             |             |      |                             |              |      |                                |              |      |
| Model 1                        | 0.04                        | -0.05, 0.12 | 0.41 | 0.01                        | -0.02, 0.04  | 0.66 | 0.01                           | -0.04, 0.07  | 0.62 |
| Model 2                        | 0.03                        | -0.06, 0.12 | 0.48 | 0.01                        | -0.02, 0.04  | 0.71 | 0.01                           | -0.05, 0.07  | 0.76 |
| Trajectory Group (N=2735)      | Thalamus (cm <sup>3</sup> ) |             |      | Amygdala (cm <sup>3</sup> ) |              |      | Hippocampus (cm <sup>3</sup> ) |              |      |
|                                | B                           | 95% CI      | p    | B                           | 95% CI       | p    | B                              | 95% CI       | p    |
| Model 1 <sup>c</sup>           |                             |             |      |                             |              |      |                                |              |      |
| No                             | Ref                         | -           | -    | Ref                         | -            | -    | Ref                            | -            | -    |
| Low                            | 0.02                        | -0.06, 0.10 | 0.60 | 0.01                        | -0.01, 0.04  | 0.29 | 0.02                           | -0.04, 0.06  | 0.57 |
| Increasing                     | -0.16                       | -0.46, 0.14 | 0.29 | -0.04                       | -0.14, 0.06  | 0.41 | -0.11                          | -0.30, 0.08  | 0.27 |
| Perinatal high                 | 0.04                        | -0.20, 0.28 | 0.73 | -0.01                       | -0.09, 0.08  | 0.86 | 0.03                           | -0.13, 0.19  | 0.73 |
| Model 2 <sup>c</sup>           |                             |             |      |                             |              |      |                                |              |      |
| No                             | Ref                         | -           | -    | Ref                         | -            | -    | Ref                            | -            | -    |
| Low                            | 0.02                        | -0.06, 0.10 | 0.66 | 0.01                        | -0.02, 0.03  | 0.62 | 0.01                           | -0.04, 0.06  | 0.71 |
| Increasing                     | -0.16                       | -0.46, 0.14 | 0.30 | -0.05                       | -0.15, 0.05  | 0.35 | -0.12                          | -0.32, 0.07  | 0.22 |
| Perinatal high                 | 0.03                        | -0.22, 0.28 | 0.81 | -0.01                       | -0.10, 0.07  | 0.80 | 0.02                           | -0.14, 0.19  | 0.77 |

a. Model 1 was adjusted for intracranial volume.

b. Model 2 was additionally adjusted for child age at scan, child sex, maternal ethnicity, maternal age at intake, maternal educational level, marital status, household income, child birth weight, maternal smoking, and maternal alcohol use.

c. Models were additionally adjusted for posterior probability of trajectory membership.

**FIGURE S2. Mediation models between maternal depressive symptoms, child total gray matter volume, and child attention problems (N=1760)**

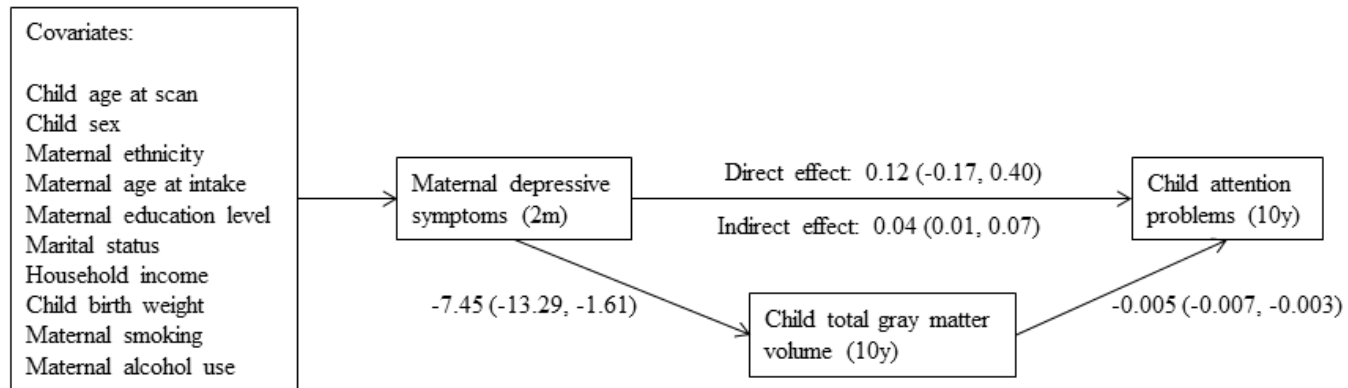

**TABLE S2. Comparison of LCGA-based trajectories model fit indices<sup>a</sup>**

| Number of Class | Growth Factors <sup>b</sup> | Fit Indices |                  |                  |                  |                   |
|-----------------|-----------------------------|-------------|------------------|------------------|------------------|-------------------|
|                 |                             | Entropy     | AIC <sup>c</sup> | BIC <sup>d</sup> | LMR <sup>e</sup> | BLRT <sup>f</sup> |
| 2               | i, s                        | 0.744       | 14525.824        | 14580.092        | P<0.001          | P<0.001           |
|                 | i, s, q                     | 0.890       | 16239.757        | 16306.084        | P<0.001          | P<0.001           |
|                 | i, s, q, c                  | 0.924       | 16523.886        | 16602.273        | P<0.001          | P<0.001           |
| 3               | i, s                        | 0.665       | 14287.055        | 14359.412        | P=0.006          | P<0.001           |
|                 | i, s, q                     | 0.635       | 14220.958        | 14311.404        | P=0.010          | P<0.001           |
|                 | i, s, q, c                  | 0.686       | 14191.399        | 14299.935        | P<0.001          | P<0.001           |
| 4               | i, s                        | 0.734       | 14168.920        | 14259.366        | P=0.004          | P<0.001           |
|                 | i, s, q                     | 0.703       | 14070.867        | 14185.433        | P=0.080          | P<0.001           |
|                 | i, s, q, c                  | 0.738       | 14040.140        | 14178.825        | P=0.004          | P<0.001           |
| 5               | i, s                        | 0.677       | 14131.408        | 14239.944        | P=0.124          | P<0.001           |
|                 | i, s, q                     | 0.749       | 13964.574        | 14103.259        | P=0.252          | P<0.001           |
|                 | i, s, q, c                  | 0.761       | 13937.861        | 14106.694        | P=0.567          | P<0.001           |

<sup>a</sup> LCGA=Latent Class Growth Analysis

<sup>b</sup> i=intercept, s=slope, q=quadratic, c=cubic, all with significance in the models

<sup>c</sup> AIC=Akaike's Information Criterion

<sup>d</sup> BIC=Bayesian Information Criterion

<sup>e</sup> LMR=Lo-Mendell-Rubin test

<sup>f</sup> BLRT=Bootstrap Likelihood Ratio Test

**TABLE S3. Sensitivity analyses of maternal depressive symptoms and child brain development**

| Maternal Depressive Symptoms   | Global Volumetric Measures (cm <sup>3</sup> ) |                |        |                    |               |        | Global White Matter Microstructure Measures |              |       |                       |              |      |
|--------------------------------|-----------------------------------------------|----------------|--------|--------------------|---------------|--------|---------------------------------------------|--------------|-------|-----------------------|--------------|------|
|                                | Total Gray Matter                             |                |        | Total White Matter |               |        | Fractional Anisotropy (FA)                  |              |       | Mean Diffusivity (MD) |              |      |
|                                | B                                             | 95% CI         | p      | B                  | 95% CI        | p      | B                                           | 95% CI       | p     | B                     | 95% CI       | p    |
| 20 weeks of gestation (N=2348) |                                               |                |        |                    |               |        | (n=2243)                                    |              |       |                       |              |      |
| Model 1 <sup>a</sup>           | -19.14                                        | -25.32, -12.97 | <0.001 | -10.17             | -15.02, -5.32 | <0.001 | -0.28                                       | -0.46, -0.10 | 0.002 | 0.02                  | -0.01, 0.04  | 0.15 |
| Model 2 <sup>b</sup>           | -2.58                                         | -8.02, 2.85    | 0.35   | -2.32              | -6.79, 2.16   | 0.31   | -0.08                                       | -0.28, 0.11  | 0.41  | 0.02                  | -0.01, 0.04  | 0.19 |
| Child age 2 months (N=2028)    |                                               |                |        |                    |               |        | (n=1985)                                    |              |       |                       |              |      |
| Model 1                        | -11.34                                        | -17.99, -4.70  | 0.001  | -3.60              | -8.84, 1.64   | 0.18   | -0.29                                       | -0.48, -0.10 | 0.002 | 0.02                  | -0.004, 0.04 | 0.12 |
| Model 2                        | -7.53                                         | -13.11, -1.94  | 0.008  | -2.73              | -7.37, 1.92   | 0.25   | -0.22                                       | -0.41, -0.02 | 0.03  | 0.01                  | -0.01, 0.03  | 0.34 |
| Child age 3 years (N=2148)     |                                               |                |        |                    |               |        | (n=2127)                                    |              |       |                       |              |      |
| Model 1                        | -9.22                                         | -18.29, -0.16  | 0.05   | -5.55              | -12.72, 1.63  | 0.13   | -0.23                                       | -0.49, 0.03  | 0.08  | 0.03                  | -0.01, 0.06  | 0.14 |
| Model 2                        | -0.44                                         | -7.91, 7.04    | 0.91   | -1.64              | -7.83, 4.54   | 0.60   | -0.11                                       | -0.37, 0.16  | 0.44  | 0.02                  | -0.01, 0.06  | 0.18 |
| Child age 10 years (N=2603)    |                                               |                |        |                    |               |        | (n=2511)                                    |              |       |                       |              |      |
| Model 1                        | -11.00                                        | -17.31, -4.70  | 0.001  | -6.02              | -10.97, -1.07 | 0.02   | -0.21                                       | -0.39, -0.03 | 0.02  | 0.01                  | -0.01, 0.03  | 0.45 |
| Model 2                        | -2.32                                         | -7.55, 2.91    | 0.38   | -2.20              | -6.54, 2.13   | 0.32   | -0.10                                       | -0.29, 0.08  | 0.27  | 0.01                  | -0.02, 0.03  | 0.59 |
| Trajectory Group               | Global Volumetric Measures (cm <sup>3</sup> ) |                |        |                    |               |        | Global White Matter Microstructure Measures |              |       |                       |              |      |
|                                | Total Gray Matter                             |                |        | Total White Matter |               |        | Fractional Anisotropy (FA)                  |              |       | Mean Diffusivity (MD) |              |      |
|                                | B                                             | 95% CI         | p      | B                  | 95% CI        | p      | B                                           | 95% CI       | p     | B                     | 95% CI       | p    |
| N                              | 2671                                          |                |        | 2671               |               |        | 2586                                        |              |       | 2586                  |              |      |
| Model 1 <sup>c</sup>           |                                               |                |        |                    |               |        |                                             |              |       |                       |              |      |
| No                             | Ref                                           | -              | -      | Ref                | -             | -      | Ref                                         | -            | -     | Ref                   | -            | -    |
| Low                            | -6.97                                         | -12.55, -1.39  | 0.01   | -2.16              | -6.58, 2.26   | 0.34   | -0.22                                       | -0.38, -0.05 | 0.01  | 0.02                  | 0.001, 0.04  | 0.04 |
| Increasing Perinatal high      | -37.14                                        | -59.58, -14.69 | 0.001  | -24.92             | -42.67, -7.17 | 0.006  | -0.09                                       | -0.70, 0.52  | 0.77  | -0.04                 | -0.11, 0.04  | 0.34 |
| Model 2 <sup>c</sup>           |                                               |                |        |                    |               |        |                                             |              |       |                       |              |      |
| No                             | Ref                                           | -              | -      | Ref                | -             | -      | Ref                                         | -            | -     | Ref                   | -            | -    |

|                |        |               |       |        |               |      |       |              |      |       |              |      |
|----------------|--------|---------------|-------|--------|---------------|------|-------|--------------|------|-------|--------------|------|
| Low            | -2.20  | -6.84, 2.45   | 0.35  | -1.12  | -4.96, 2.72   | 0.57 | -0.13 | -0.30, 0.04  | 0.13 | 0.02  | -0.002, 0.04 | 0.07 |
| Increasing     | -14.71 | -32.94, 3.52  | 0.11  | -12.46 | -27.54, 2.63  | 0.11 | 0.12  | -0.49, 0.72  | 0.71 | -0.03 | -0.11, 0.04  | 0.38 |
| Perinatal high | -20.74 | -36.18, -5.29 | 0.008 | -14.56 | -27.34, -1.77 | 0.03 | -0.58 | -1.10, -0.05 | 0.03 | 0.05  | -0.01, 0.12  | 0.12 |

a. Model 1 was adjusted for no covariates.

b. Model 2 was adjusted for child age at scan, child sex, maternal ethnicity, maternal age at intake, maternal educational level, marital status, household income, child birth weight, maternal smoking, and maternal alcohol use.

c. Models were additionally adjusted for posterior probability of trajectory membership.
